# Supplementary material for: 3D Printed Microfluidic Devices for Drug Release Assays
Source: MDPI journal article supplement (doi:10.3390/pharmaceutics13010013), 2020-12-23
Supplement: s1 [file s1]

## Supplementary Materials: 3D Printed Microfluidic Devices for Drug Release Assays

Benzion Amoyav, Yoel Goldstein, Eliana Steinberg and Ofra Benny

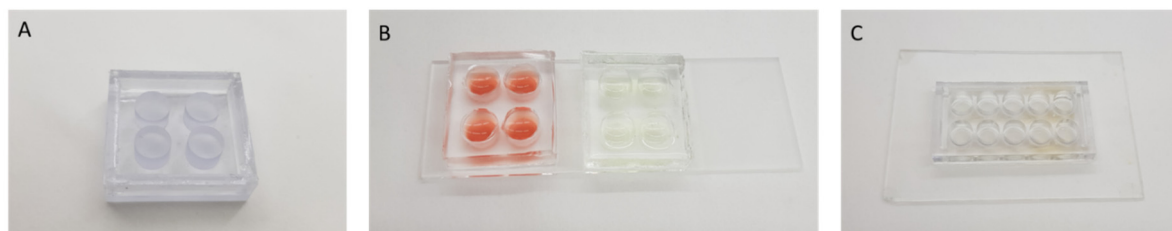

**Figure S1.** A fast and effective way to fabricate a resin and a PDMS based device by 3D printed mold. **(A)** A 3D printed mold of 96-well dimension printed using a 3D printer. The PDMS resin is poured into the pattern framework and after overnight crosslinking process the PDMS gently peeled from the framework and went through O<sub>2</sub> plasma bonding machine for final glass bonding. **(B)** 150  $\mu$ l of 6-coumarin and doxorubicin solutions placed inside the wells for 24 h incubation in 37 °C. **(C)** Freeprint® molds printed on glass slides. The wells were designed to contain the exact dimensions of wells in 96-well plates.

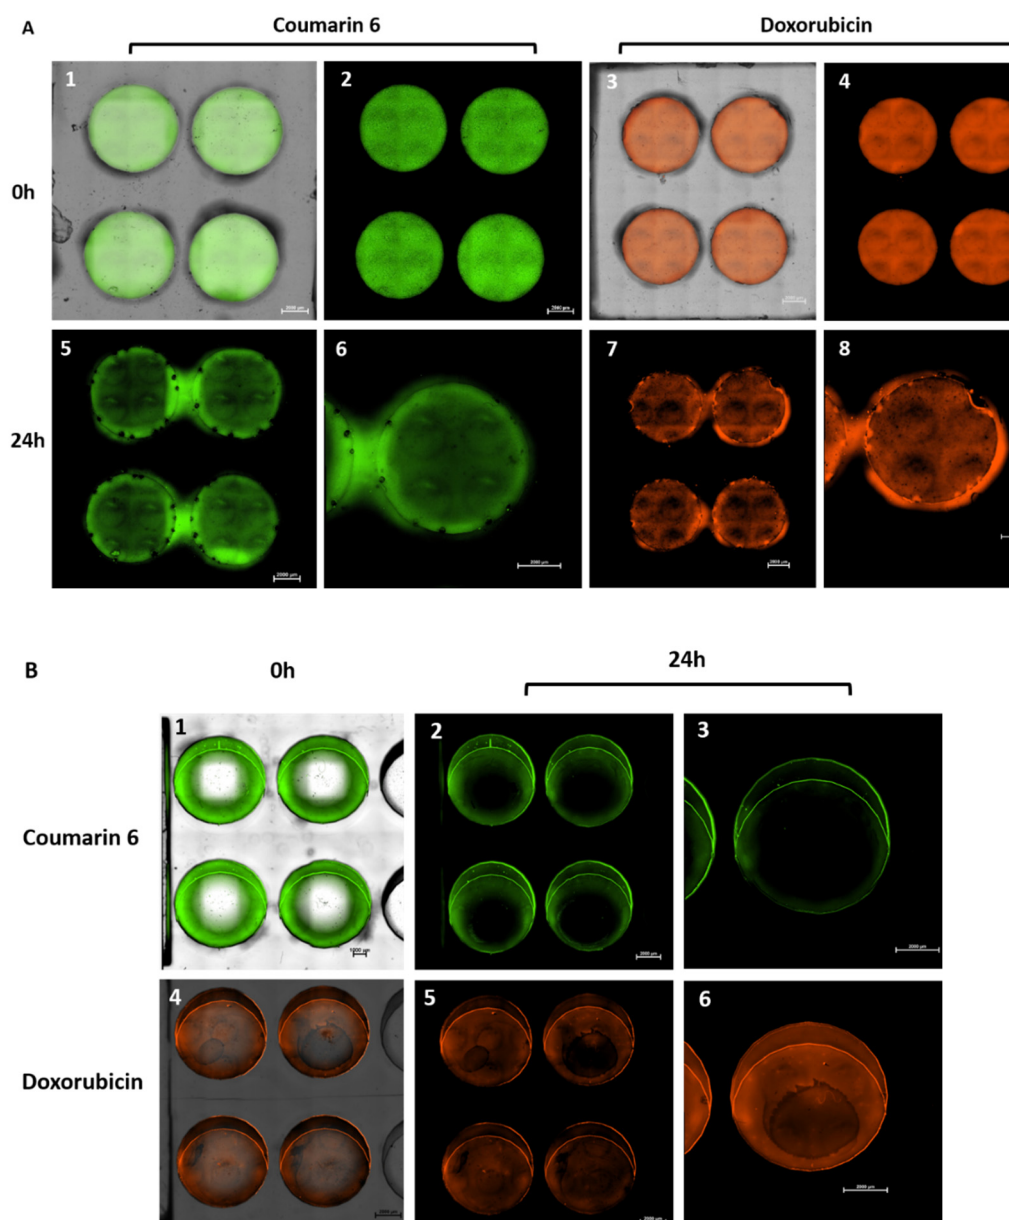

**Figure S2.** Bright-field light and fluorescence microscopy images of PDMS (A) and 3D printed (B) molds of wells containing solutions of 6-coumarin (GPF, green) and doxorubicin (CY3, orange). 150  $\mu\text{l}$  of 6-coumarin (hydrophobic) and doxorubicin (hydrophilic) solutions placed in 96-well designs of either a PDMS or a 3D printed mold for 24 h incubation in 37  $^{\circ}\text{C}$ . (A) Fluorescence images (5,6,7,8) of PDMS mold shows a significant absorption of both molecules to the PDMS substrate. (B) Fluorescence images (4,5,6) of 3D printed resin mold shows no absorption of both 6-coumarin and doxorubicin after 24 h. (scale bar— 2000  $\mu\text{m}$ ).
